# Supplementary figures and images for: Mitochondrial Genotoxicity of Hepatitis C Treatment among People Who Inject Drugs
Source: MDPI journal article supplement (doi:10.3390/jcm10214824), 2021-10-20

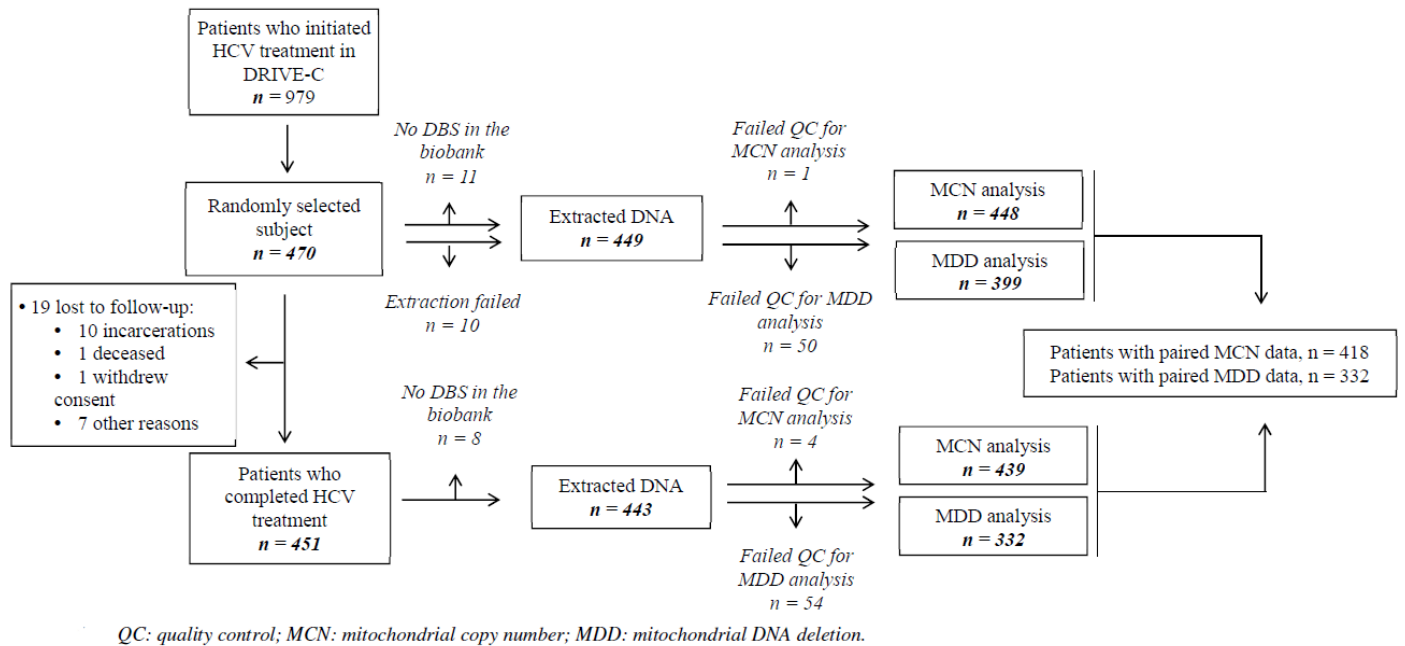

**Supplementary Figure S1.** Sample flow chart.

Supplement: s1 [file s1]
